# Supplementary material
Source: publisher figshare collection journal article supplement (https://sage.figshare.com/ndownloader/files/14284379)

## Appendix B: Practice-specific Monthly Report

### All Measures (Missed Elevated Blood Pressure)

Individual Practice Report for [REDACTED] 4/15/2016

**Taken and documented appropriate action for elevated blood pressure-  
Diagnose**

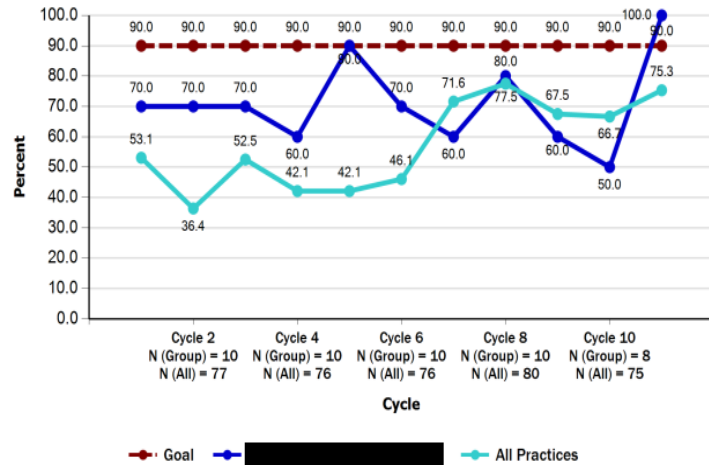

**Elevated blood pressure documented in the chart**

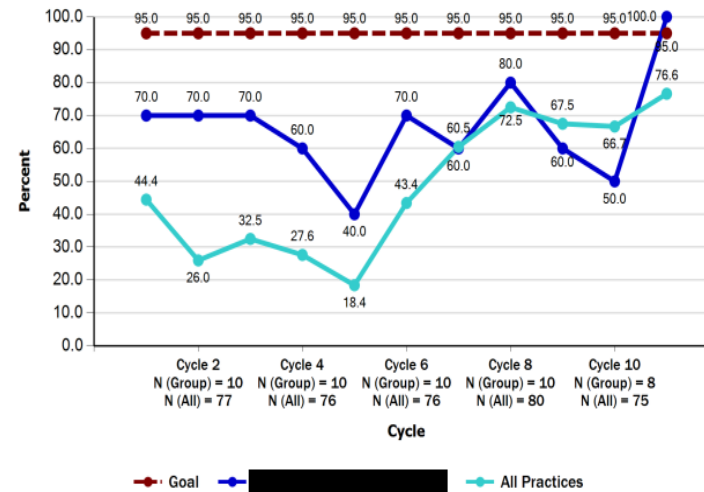

**Record of the patient's systolic and diastolic blood pressure percentiles in  
chart-Recognize**

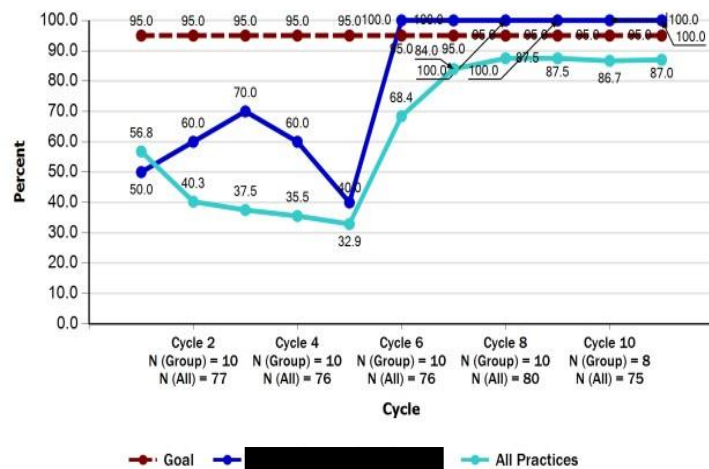

Supplement: Supplementary file 1 [file 14284379]
